# Supplementary material for: Changes in Patterns of Physical Activity and Risk of Heart Failure in Newly Diagnosed Diabetes Mellitus Patients
Source: PubMed Central journal article supplement — Diabetes Metab J. 2021 Nov 24;46(2):327–36. doi: 10.4093/dmj.2021.0046 (PMC8987691; doi:10.4093/dmj.2021.0046), 2021-11-24
Supplement: dmj-2021-0046-suppl1.pdf [file dmj-2021-0046-suppl1.pdf]

**Supplementary Table 1.** Subgroup analysis of study participants

| Variable                         | Number | CHF | Duration   | IR (1,000 person-years) | HR (95% CI)      | P for interaction |
|----------------------------------|--------|-----|------------|-------------------------|------------------|-------------------|
| Age, yr                          |        |     |            |                         |                  | 0.6837            |
| <65                              |        |     |            |                         |                  |                   |
| Continuously physically inactive | 65,527 | 366 | 315,317.02 | 1.16                    | 1 (reference)    |                   |
| Physically active to inactive    | 10,236 | 63  | 49,812.33  | 1.26                    | 1.02 (0.78–1.34) |                   |
| Physically inactive to active    | 16,544 | 74  | 80,256.56  | 0.92                    | 0.81 (0.63–1.04) |                   |
| Continuously physically active   | 8,606  | 35  | 41,784.48  | 0.84                    | 0.72 (0.51–1.02) |                   |
| ≥65                              |        |     |            |                         |                  |                   |
| Continuously physically inactive | 20,206 | 555 | 97,289.57  | 5.70                    | 1 (reference)    |                   |
| Physically active to inactive    | 4,023  | 88  | 19,533.21  | 4.51                    | 0.87 (0.69–1.09) |                   |
| Physically inactive to active    | 4,442  | 86  | 21,673.08  | 3.97                    | 0.79 (0.62–0.99) |                   |
| Continuously physically active   | 2,834  | 54  | 13,643.88  | 3.96                    | 0.84 (0.63–1.12) |                   |
| Sex                              |        |     |            |                         |                  | 0.0216            |
| Male                             |        |     |            |                         |                  |                   |
| Continuously physically inactive | 52,586 | 464 | 251,227.6  | 1.85                    | 1 (reference)    |                   |
| Physically active to inactive    | 9,289  | 106 | 44,799.55  | 2.37                    | 1.10 (0.89–1.36) |                   |
| Physically inactive to active    | 14,144 | 103 | 68,387.1   | 1.51                    | 0.81 (0.66–1.01) |                   |
| Continuously physically active   | 8,485  | 57  | 41,019.42  | 1.39                    | 0.70 (0.53–0.92) |                   |
| Female                           |        |     |            |                         |                  |                   |
| Continuously physically inactive | 33,147 | 457 | 161,378.99 | 2.83                    | 1 (reference)    |                   |
| Physically active to inactive    | 4,970  | 45  | 24,546     | 1.83                    | 0.68 (0.50–0.92) |                   |
| Physically inactive to active    | 6,842  | 57  | 33,542.55  | 1.70                    | 0.76 (0.58–1.00) |                   |
| Continuously physically active   | 2,955  | 32  | 14,408.95  | 2.22                    | 1.00 (0.69–1.44) |                   |
| Hypertension                     |        |     |            |                         |                  | 0.6907            |
| No                               |        |     |            |                         |                  |                   |
| Continuously physically inactive | 37,652 | 218 | 180,900.17 | 1.21                    | 1 (reference)    |                   |
| Physically active to inactive    | 5,893  | 29  | 28,623.65  | 1.01                    | 0.79 (0.53–1.16) |                   |
| Physically inactive to active    | 9,664  | 38  | 46,883.91  | 0.81                    | 0.73 (0.52–1.03) |                   |
| Continuously physically active   | 4,974  | 24  | 24,136.01  | 0.99                    | 0.86 (0.56–1.31) |                   |
| Yes                              |        |     |            |                         |                  |                   |
| Continuously physically inactive | 48,081 | 703 | 231,706.43 | 3.03                    | 1 (reference)    |                   |
| Physically active to inactive    | 8,366  | 122 | 40,721.89  | 3.00                    | 0.96 (0.79–1.17) |                   |
| Physically inactive to active    | 11,322 | 122 | 55,045.74  | 2.22                    | 0.81 (0.66–0.98) |                   |
| Continuously physically active   | 6,466  | 65  | 31,292.35  | 2.08                    | 0.75 (0.58–0.97) |                   |
| Dyslipidemia                     |        |     |            |                         |                  | 0.3024            |
| No                               |        |     |            |                         |                  |                   |
| Continuously physically inactive | 41,084 | 407 | 200,121.25 | 2.03                    | 1 (reference)    |                   |
| Physically active to inactive    | 6,955  | 57  | 34,267.36  | 1.66                    | 0.77 (0.58–1.02) |                   |
| Physically inactive to active    | 10,514 | 64  | 51,635.69  | 1.24                    | 0.70 (0.54–0.91) |                   |
| Continuously physically active   | 5,843  | 41  | 28,613.07  | 1.43                    | 0.76 (0.55–1.06) |                   |

(Continued to the next page)

Supplementary Table 1. Continued

| Variable                         | Number | CHF | Duration   | IR (1,000 person-years) | HR (95% CI)      | P for interaction |
|----------------------------------|--------|-----|------------|-------------------------|------------------|-------------------|
| Yes                              |        |     |            |                         |                  |                   |
| Continuously physically inactive | 44,649 | 514 | 212,485.35 | 2.42                    | 1 (reference)    | 0.6063            |
| Physically active to inactive    | 7,304  | 94  | 35,078.18  | 2.68                    | 1.05 (0.84–1.30) |                   |
| Physically inactive to active    | 10,472 | 96  | 50,293.96  | 1.91                    | 0.86 (0.69–1.07) |                   |
| Continuously physically active   | 5,597  | 48  | 26,815.3   | 1.79                    | 0.79 (0.59–1.06) |                   |
| CKD                              |        |     |            |                         |                  |                   |
| No                               |        |     |            |                         |                  |                   |
| Continuously physically inactive | 80,521 | 770 | 387,317.56 | 1.99                    | 1 (reference)    | 0.6556            |
| Physically active to inactive    | 13,301 | 129 | 64,690.91  | 1.99                    | 0.93 (0.77–1.12) |                   |
| Physically inactive to active    | 19,843 | 137 | 96,364.94  | 1.42                    | 0.78 (0.65–0.94) |                   |
| Continuously physically active   | 10,767 | 73  | 52,122.28  | 1.40                    | 0.73 (0.57–0.93) |                   |
| Yes                              |        |     |            |                         |                  |                   |
| Continuously physically inactive | 5,212  | 151 | 25,289.03  | 5.97                    | 1 (reference)    | 0.6556            |
| Physically active to inactive    | 958    | 22  | 4,654.63   | 4.73                    | 0.85 (0.54–1.33) |                   |
| Physically inactive to active    | 1,143  | 23  | 5,564.71   | 4.13                    | 0.80 (0.52–1.25) |                   |
| Continuously physically active   | 673    | 16  | 3,306.09   | 4.84                    | 1.06 (0.63–1.78) |                   |
| CVD                              |        |     |            |                         |                  |                   |
| No                               |        |     |            |                         |                  |                   |
| Continuously physically inactive | 83,653 | 857 | 402,888.61 | 2.13                    | 1 (reference)    | 0.5058            |
| Physically active to inactive    | 13,913 | 143 | 67,662.43  | 2.11                    | 0.94 (0.78–1.12) |                   |
| Physically inactive to active    | 20,445 | 145 | 99,338.42  | 1.46                    | 0.77 (0.65–0.92) |                   |
| Continuously physically active   | 11,158 | 82  | 54,105.78  | 1.52                    | 0.77 (0.61–0.96) |                   |
| Yes                              |        |     |            |                         |                  |                   |
| Continuously physically inactive | 2,080  | 64  | 9,717.98   | 6.59                    | 1 (reference)    | 0.5058            |
| Physically active to inactive    | 346    | 8   | 1,683.11   | 4.75                    | 0.74 (0.35–1.55) |                   |
| Physically inactive to active    | 541    | 15  | 2,591.23   | 5.79                    | 1.02 (0.57–1.79) |                   |
| Continuously physically active   | 282    | 7   | 1,322.58   | 5.29                    | 0.99 (0.45–2.18) |                   |
| Obesity, kg/m <sup>2a</sup>      |        |     |            |                         |                  |                   |
| <25                              |        |     |            |                         |                  |                   |
| Continuously physically inactive | 41,330 | 430 | 199,136.31 | 2.16                    | 1 (reference)    | 0.5058            |
| Physically active to inactive    | 7,178  | 65  | 35,032.47  | 1.86                    | 0.81 (0.62–1.05) |                   |
| Physically inactive to active    | 10,761 | 75  | 52,344.47  | 1.43                    | 0.75 (0.59–0.96) |                   |
| Continuously physically active   | 6,033  | 41  | 29,211.58  | 1.40                    | 0.70 (0.50–0.96) |                   |
| ≥25                              |        |     |            |                         |                  |                   |
| Continuously physically inactive | 44,403 | 491 | 213,470.28 | 2.30                    | 1 (reference)    | 0.5058            |
| Physically active to inactive    | 7,081  | 86  | 34,313.07  | 2.51                    | 1.04 (0.83–1.31) |                   |
| Physically inactive to active    | 10,225 | 85  | 49,585.18  | 1.71                    | 0.83 (0.66–1.04) |                   |
| Continuously physically active   | 5,407  | 48  | 26,216.78  | 1.83                    | 0.87 (0.65–1.18) |                   |

(Continued to the next page)

Supplementary Table 1. Continued

| Variable                         | Number | CHF | Duration   | IR (1,000 person-years) | HR (95% CI)      | P for interaction |
|----------------------------------|--------|-----|------------|-------------------------|------------------|-------------------|
| Weight change <sup>b</sup>       |        |     |            |                         |                  | 0.4933            |
| Weight gain                      |        |     |            |                         |                  |                   |
| Continuously physically inactive | 17,397 | 203 | 82,726.71  | 2.45                    | 1 (reference)    |                   |
| Physically active to inactive    | 2,781  | 33  | 13,359.06  | 2.47                    | 0.96 (0.67–1.39) |                   |
| Physically inactive to active    | 5,103  | 49  | 24,501.76  | 2.00                    | 1.03 (0.75–1.41) |                   |
| Continuously physically active   | 2,351  | 18  | 11,313.68  | 1.59                    | 0.73 (0.45–1.19) |                   |
| Weight stable                    |        |     |            |                         |                  |                   |
| Continuously physically inactive | 59,829 | 600 | 288,407.1  | 2.08                    | 1 (reference)    |                   |
| Physically active to inactive    | 10,160 | 105 | 49,468.97  | 2.12                    | 0.96 (0.78–1.18) |                   |
| Physically inactive to active    | 14,047 | 95  | 68,294.12  | 1.39                    | 0.72 (0.58–0.89) |                   |
| Continuously physically active   | 8,206  | 61  | 39,751.93  | 1.53                    | 0.79 (0.60–1.02) |                   |
| Weight loss                      |        |     |            |                         |                  |                   |
| Continuously physically inactive | 8,475  | 117 | 41,318.52  | 2.83                    | 1 (reference)    |                   |
| Physically active to inactive    | 1,316  | 13  | 6,510.36   | 2.00                    | 0.70 (0.39–1.24) |                   |
| Physically inactive to active    | 1,828  | 16  | 9,101.68   | 1.76                    | 0.68 (0.40–1.15) |                   |
| Continuously physically active   | 881    | 10  | 4,352.77   | 2.30                    | 0.87 (0.45–1.67) |                   |
| Malignancy                       |        |     |            |                         |                  | 0.1431            |
| No                               |        |     |            |                         |                  |                   |
| Continuously physically inactive | 82,954 | 884 | 400,046.05 | 2.21                    | 1 (reference)    |                   |
| Physically active to inactive    | 13,710 | 140 | 66,823.25  | 2.10                    | 0.90 (0.75–1.07) |                   |
| Physically inactive to active    | 20,168 | 152 | 98,230.46  | 1.55                    | 0.79 (0.66–0.93) |                   |
| Continuously physically active   | 11,012 | 80  | 53,486.73  | 1.50                    | 0.74 (0.59–0.93) |                   |
| Yes                              |        |     |            |                         |                  |                   |
| Continuously physically inactive | 2,779  | 37  | 12,560.55  | 2.94                    | 1 (reference)    |                   |
| Physically active to inactive    | 549    | 11  | 2,522.29   | 4.36                    | 1.39 (0.70–2.73) |                   |
| Physically inactive to active    | 818    | 8   | 3,699.19   | 2.16                    | 0.85 (0.40–1.84) |                   |
| Continuously physically active   | 428    | 9   | 1,941.63   | 4.64                    | 1.47 (0.70–3.08) |                   |

Adjusted for age, sex, current smoking, alcohol, income, waist circumference, hypertension, dyslipidemia, CKD, stroke, myocardial infarction, and fasting blood glucose.

CHF, congestive heart failure; IR, incidence rate; HR, hazard ratio; CI, confidence interval; CKD, chronic kidney disease.

<sup>a</sup>The body mass index cutoff of 25 kg/m<sup>2</sup> was used to define obesity in the Korean population in this study, <sup>b</sup>Weight change was calculated for each subject as the difference in weight between the follow-up health examination and baseline examination and divided into three categories: stable, gain or loss of less than 5% of body weight at baseline; gain, gain of 5% or more of body weight at baseline; loss, loss of 5% or more of body weight at baseline.
